# Supplementary material for: A versatile strategy for ultrathin SnS2 nanosheets confined in a N-doped graphene sheet composite for high performance lithium and sodium-ion batteries
Source: Royal Society of Chemistry journal article supplement (doi:10.1039/c8cc04255a), 2018-01-01
Supplement: c8cc04255a1.pdf [file c8cc04255a1.pdf]

# **Versatile Strategy for Ultrathin SnS<sub>2</sub> Nanosheets Confined in N-Doped Graphene Sheets Composite for High Performance Lithium and Sodium-ion batteries**

## **Experimental Section**

**Synthesis of SnS<sub>2</sub>/3DNG:** The graphene oxide (GO) was synthesized by a modified Hummers method as the previous report [28]. Briefly, 50 mg GO powder was dissolved in 30 mL of deionized water by ultrasonic dispersion for 30 min forming yellow solution. After that, 2 mmol of SnCl<sub>4</sub>•5H<sub>2</sub>O and 4 mmol CH<sub>4</sub>N<sub>2</sub>S were added into above solution under magnetic stirring for 1h. The homogenous mixture was transferred to a refrigerator and frozen for overnight. Then, the precursors were obtained by freeze-drying treatment for 24 h and then heated at 400 °C for 2 h under Ar atmosphere, and the final black powder is denoted as SnS<sub>2</sub>/NGS.

**Material Characterization:** The X-ray powder diffraction (XRD) pattern was recorded by a Bruker D8 ADVANCE X-ray diffractometer with Cu K<sub>α</sub> radiation ( $\lambda = 0.15418$  nm) at a scanning rate of 4° min<sup>-1</sup>. Field-emission scanning electron microscopy (SEM) images were obtained on a ZEISS microscope with an accelerating voltage of 20 kV. Transmission electron microscopy (TEM) images and high-resolution TEM (HRTEM) images were obtained by a JEOL JEM-2000CX

instrument. Nitrogen adsorption and desorption isotherm was characterized by a ASAP2020. The XPS experiments were carried out on a PHI-5400 electron spectrometer. The Raman spectrum was performed by a Raman spectrometer (Horiba Xplora). The thermogravimetric analysis (TGA) was conducted on a thermogravimetric analyzer (TGA, SDTA851).

**Electrochemical Measurements:** The working electrode was prepared by mixing the  $\text{SnS}_2$ /3DNG powder, acetylene black, and polyvinylidene difluoride (PVDF) in a weight ratio of 70:20:10. The slurry was pasted to Cu foil for LIBs and SIBs, and then dried at 100 °C overnight under vacuum. CR2032-type coin cells were assembled in an argon-filled glovebox. For LIBs half-cells, Li-metal foil use as counter electrode, and 1.0 M  $\text{LiPF}_6$  dissolved in ethylene carbonate (EC)/dimethyl carbonate (DMC)/diethyl carbonate (DEC) (1:1:1 by volume) use as electrolyte. For SIBs half-cells, Na-metal foil used as counter electrode, and 1.0 M  $\text{NaClO}_4$  in propylene carbonate (PC) with 2% fluoroethylene carbonate (FEC) used as electrolyte. Glass fiber membrane (Whatman GF/D) used as separator. The charge-discharge tests were carried out on LAND CT2001A systems. The cyclic voltammetry (CV) curves and electrochemical impedance spectroscopy (EIS) were tested on VSP electrochemical workstation (Bio-logic, France).

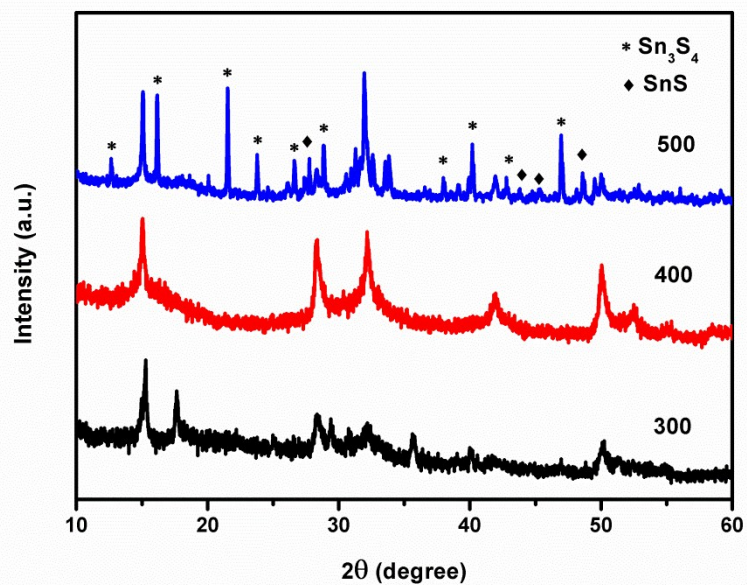

**Figure S1.** XRD patterns of the precursors are annealed at different temperatures.

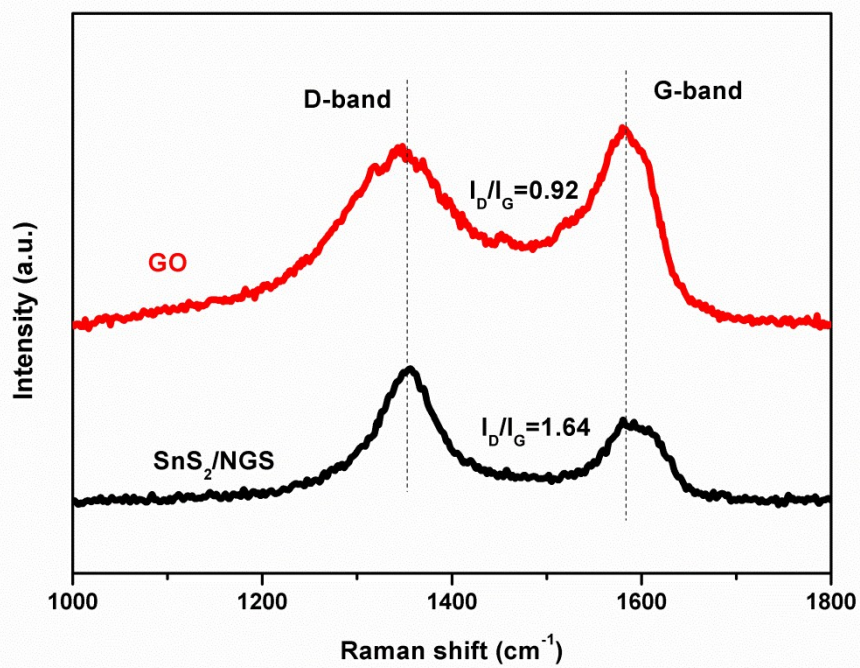

**Figure S2.** Raman spectra of GO and  $\text{SnS}_2/\text{NGS}$ .

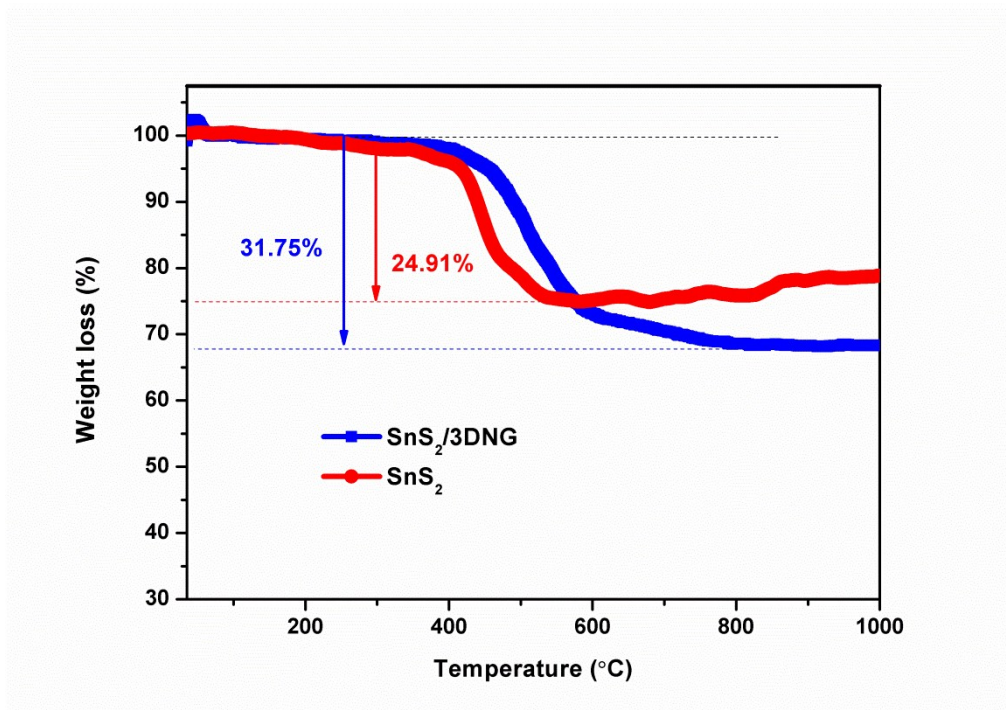

**Figure S3.** TGA curves in the air atmosphere of the SnS<sub>2</sub> and SnS<sub>2</sub>/NGS.

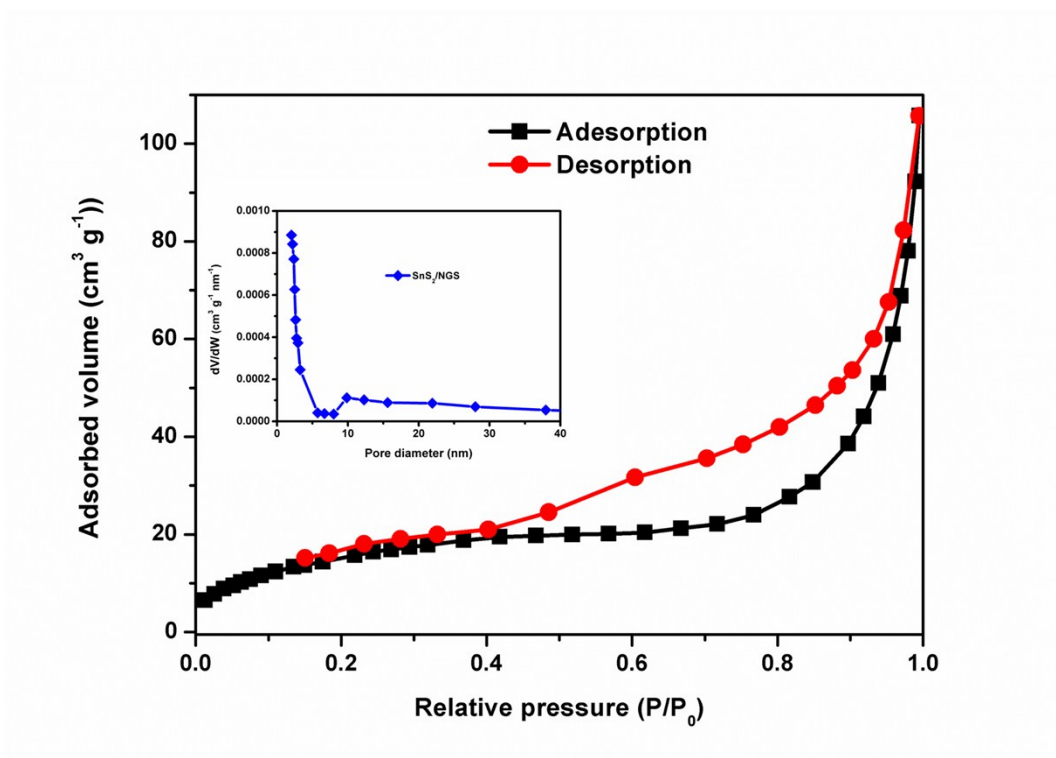

**Figure S4.** The nitrogen adsorption/desorption isotherm plots. Pore (inset) size distribution of SnS<sub>2</sub>/NGS.



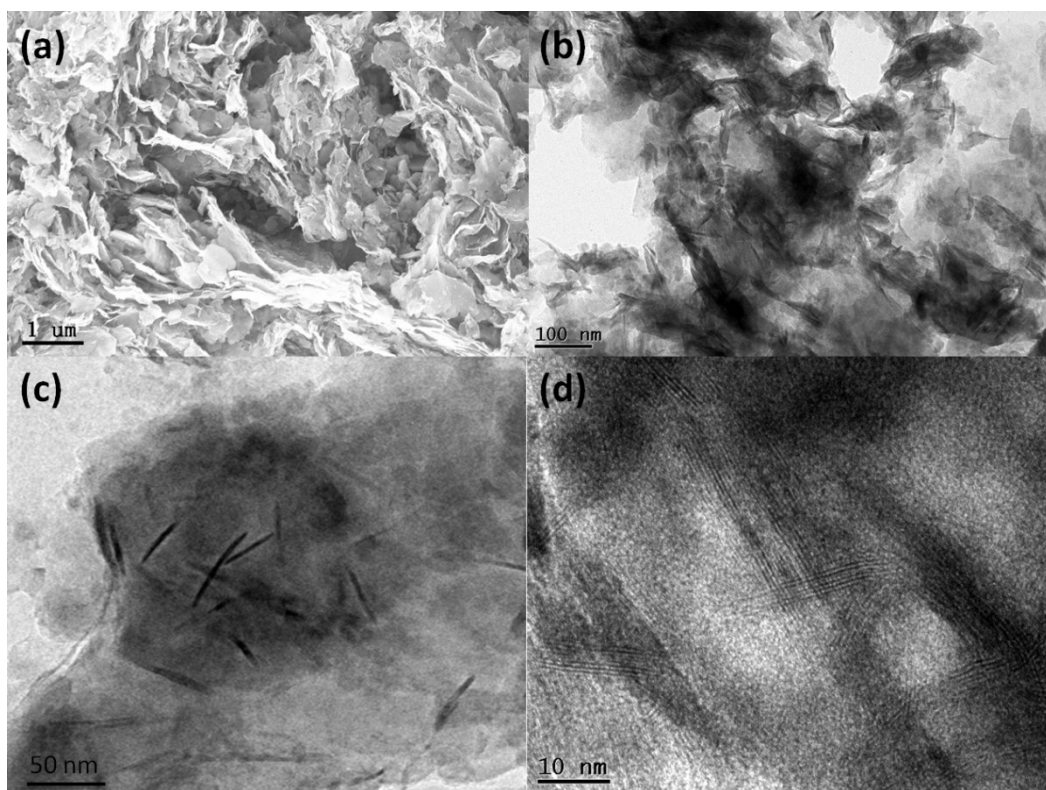

**Figure S5.** The detail morphology of SnS<sub>2</sub>/NGS. (a) SEM image, (b) and (d) TEM images, (c) HRTEM image.

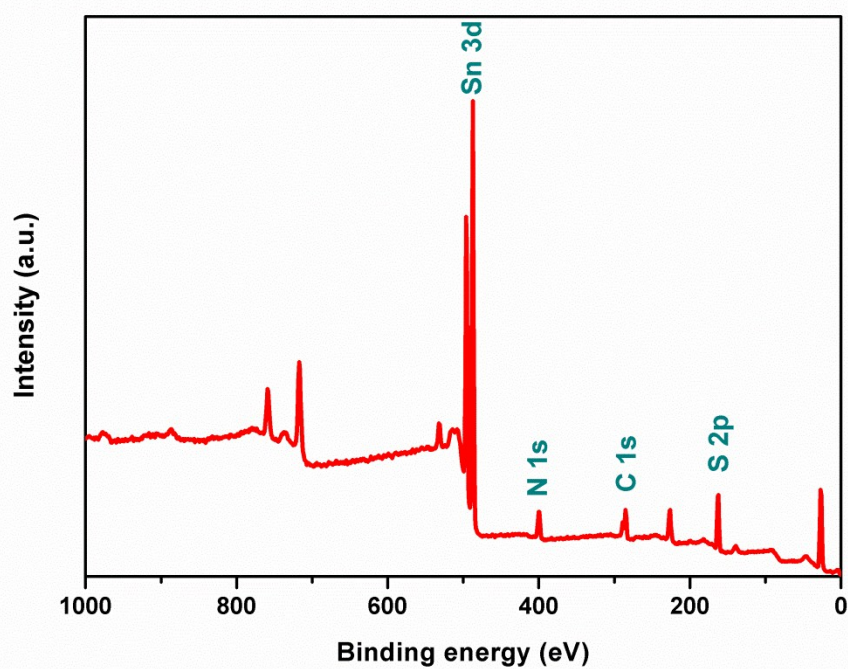

**Figure S6.** XPS survey spectrum of SnS<sub>2</sub>/NGS.

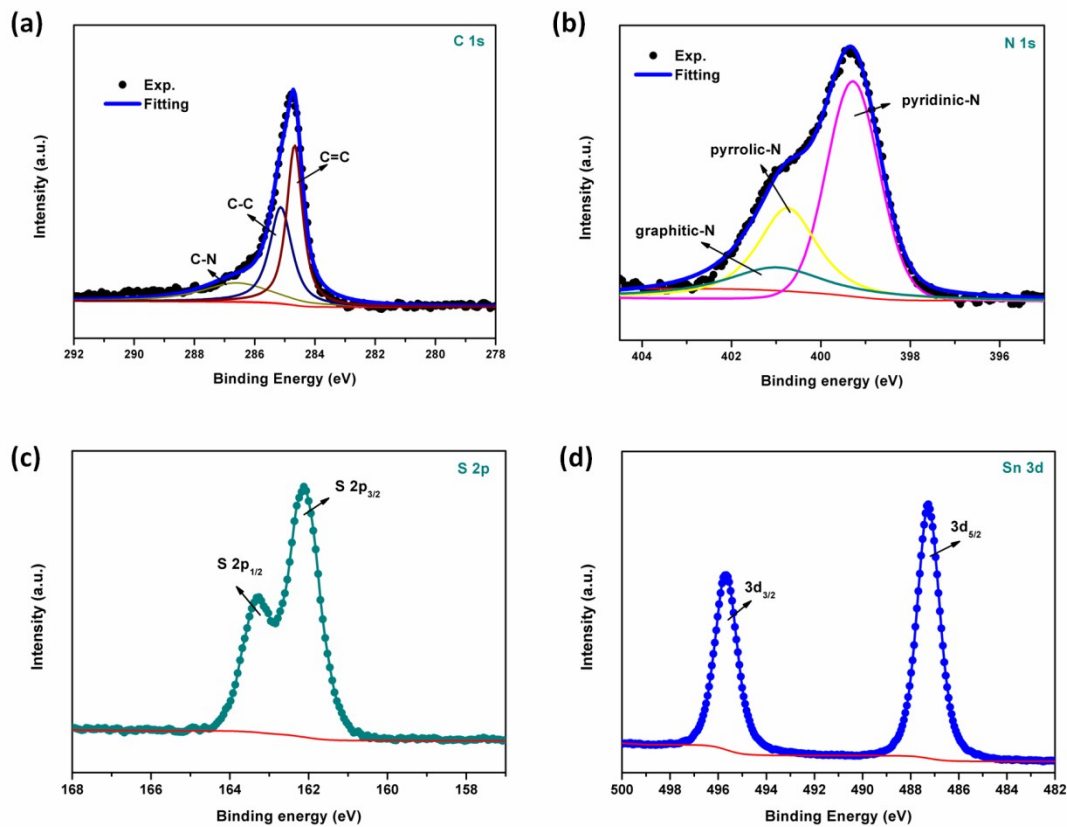

**Figure S7.** High-resolution XPS spectra of (a) C 1s, (b) N 1s, (c) S 2p and (d) Sn 3d of the SnS<sub>2</sub>/NGS.

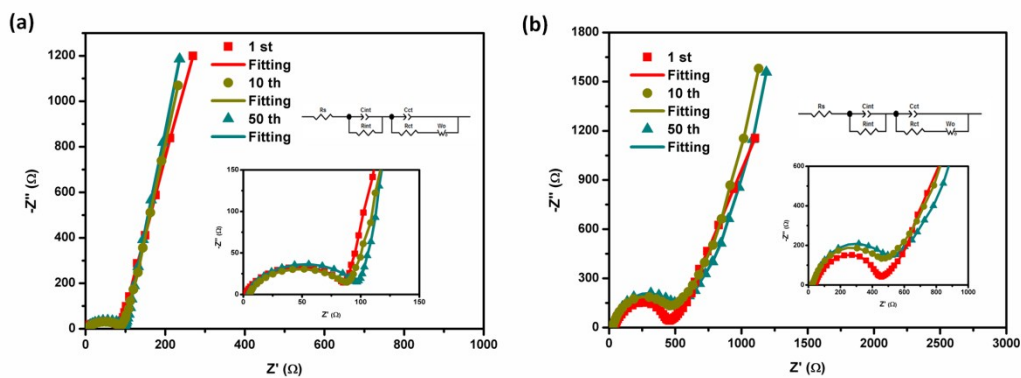

**Figure S8.** Nyquist plots of SnS<sub>2</sub>/NGS electrode at different cycles for (a) LIBs, (b) SIBs. Insets depict the equivalent circuit and enlarged spectra high frequency.

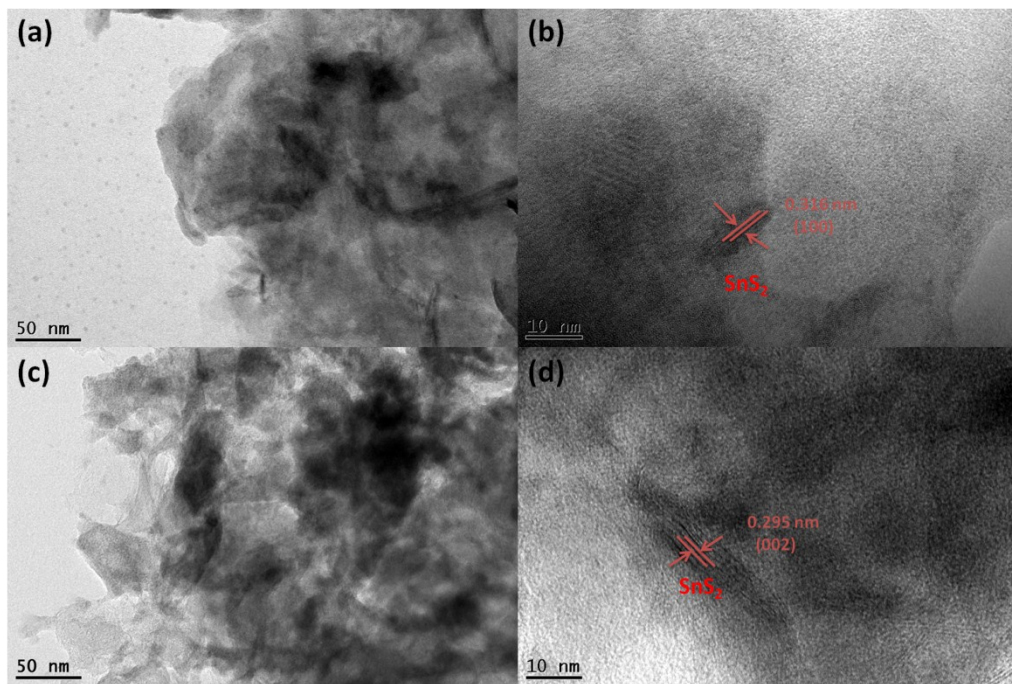

**Figure S9.** TEM images of SnS<sub>2</sub>/NGS after 50 cycles at 0.1 A g<sup>-1</sup>. (a, b) lithium-ion battery (c, d) sodium-ion battery.

**Table S1.** Equivalent circuit parameters of the SnS<sub>2</sub>/NGS electrode for LIBs and SIBs.

| Sample                        |     | Cycle number           | R <sub>s</sub> /Ohm | R <sub>int</sub> /Ohm | R <sub>ct</sub> /Ohm |
|-------------------------------|-----|------------------------|---------------------|-----------------------|----------------------|
| SnS <sub>2</sub> /NGS<br>LIBs | for | 1 <sup>st</sup> cycle  | 2.5                 | 67.8                  | 10.1                 |
|                               |     | 10 <sup>th</sup> cycle | 4.4                 | 64.6                  | 12.4                 |
|                               |     | 50 <sup>th</sup> cycle | 5.6                 | 54.8                  | 17.6                 |
| SnS <sub>2</sub> /NGS<br>SIBs | for | 1 <sup>st</sup> cycle  | 24.0                | 383.4                 | 24.7                 |
|                               |     | 10 <sup>th</sup> cycle | 32.2                | 358.0                 | 45.7                 |
|                               |     | 50 <sup>th</sup> cycle | 20.2                | 358.8                 | 36.2                 |

**Table S2.** Comparison of the electrochemical performance for SnS<sub>2</sub>-based anode in the previous literature with our sample

| Electrode materials      | Application | Rate performance                                   | Cycling performance                                              | Ref |
|--------------------------|-------------|----------------------------------------------------|------------------------------------------------------------------|-----|
| SnS <sub>2</sub> /G-As   | LIBs        | 240 mAh g <sup>-1</sup> at 1000 mA g <sup>-1</sup> | 656 mAh g <sup>-1</sup> at 50 mA g <sup>-1</sup> after 30 cycles | 1   |
| SnS <sub>2</sub> /VACNTs | LIBs        | 223 mAh g <sup>-1</sup> at 2000 mA g <sup>-1</sup> | 551 mAh/g at 100 mA g <sup>-1</sup> after 100 cycles             | 2   |

|                                 |      |                                                       |                                                                       |      |
|---------------------------------|------|-------------------------------------------------------|-----------------------------------------------------------------------|------|
| <b>SnS<sub>2</sub>-NGS</b>      | LIBs | 200 mAh g <sup>-1</sup> at 10000 mA g <sup>-1</sup>   | 914 mAh g <sup>-1</sup> at 800 mA g <sup>-1</sup> after 150 cycles    | 3    |
|                                 | SIBs | 148 mAh g <sup>-1</sup> at 10000 mA g <sup>-1</sup>   | 450 mAh g <sup>-1</sup> at 200 mA g <sup>-1</sup> after 100 cycles    |      |
| <b>Net-like SnS<sub>2</sub></b> | LIBs | 358.71 mAh g <sup>-1</sup> at 800 mA g <sup>-1</sup>  | 401.31 mAh g <sup>-1</sup> at 100 mA g <sup>-1</sup> after 100 cycles | 4    |
| <b>c-SnS<sub>2</sub> NSA</b>    | SIBs | 140 mAh g <sup>-1</sup> at 5000 mA g <sup>-1</sup>    | 420 mAh g <sup>-1</sup> at 500 mA g <sup>-1</sup> after 100 cycles    | 5    |
| <b>SnS<sub>2</sub>-G</b>        | LIBs | 498 mAh g <sup>-1</sup> at 8000 mA g <sup>-1</sup>    | 826 mAh g <sup>-1</sup> at 500 mA g <sup>-1</sup> after 200 cycles    | 6    |
| <b>SnS<sub>2</sub>/NRGO</b>     | LIBs | 402 mAh g <sup>-1</sup> at 2000 mA g <sup>-1</sup>    | 297 mAh g <sup>-1</sup> at 200 mA g <sup>-1</sup> after 200 cycles    | 7    |
| <b>SnS<sub>2</sub>/graphene</b> | SIBs | 321 mAh g <sup>-1</sup> at 5000 mA g <sup>-1</sup>    | 458 mAh g <sup>-1</sup> at 500 mA g <sup>-1</sup> after 250 cycles    | 8    |
| <b>LL-SnS<sub>2</sub>/G</b>     | LIBs | 567.78 mAh g <sup>-1</sup> at 2000 mA g <sup>-1</sup> | 696.27 mAh g <sup>-1</sup> at 200 mA g <sup>-1</sup> after 180 cycles | 9    |
| <b>SnS<sub>2</sub>/NGS</b>      | LIBs | 488 mAh g <sup>-1</sup> at 8000 mA g <sup>-1</sup>    | 763 mAh g <sup>-1</sup> at 500 mA g <sup>-1</sup> after 200 cycles    | This |
|                                 | SIBs | 364 mAh g <sup>-1</sup> at 5000 mA g <sup>-1</sup>    | 453 mAh g <sup>-1</sup> at 500 mA g <sup>-1</sup> after 200 cycles    | work |

## Reference

- 1 X. Jiang, X. Yang, Y. Zhu, J. Shen, K. Fan, C. Li, J. Power Sources, 2013, 237, 178-186.
- 2 W. Deng, X. Chen, Z. Liu, A. Hu, Q. Tang, Z. Li, Y. Xiong, J. Power Sources, 2015, 277, 131-138.
- 3 Y. Jiang, Y. Feng, B. Xi, S. Kai, K. Mi, J. Feng, J. Zhang, S. Xiong, J. Mater. Chem. A, 2016, 4, 10719-10726.
- 4 L. Yin, S. Chai, J. Huang, X. Kong, J. Wang, Y. Liu, Preparation and enhanced lithium-ion storage performance of 3D network-like SnS<sub>2</sub> anode, J. Alloys and Compd. 2017, 727, 1006-1013.
- 5 Y. Wang, J. Zhou, J. Wu, F. Chen, P. Li, N. Han, W. Huang, Y. Liu, H. Ye, F. Zhao, Y. Li, J. Mater. Chem. A, 2017, 5, 25618-25624.
- 6 Q. Zhang, Y. Sun, X. Zhang, J. Guo, Mater. Lett., 2016, 185, 311-314.
- 7 D. H. Youn, S. K. Stauffer, P. Xiao, H. Park, Y. Nam, A. Dolocan, G. Henkelman, A. Heller, C. B. Mullins, ACS Nano, 2016, 10, 10778-10788.



- 8 X. Li, X. Sun, Z. Gao, X. Hu, R. Ling, S. Cai, C. Zheng, W. Hu, *ChemSusChem*, 2018, 11, 1549-1557.
- 9 J. Xia, J. Xie, H. Yan, Y. Yuan, M. Chen, C. Huang, Y. Zhang, S. Nie, X. Y. Wang, *Electrochim. Acta*, 2018, 269, 452-461.
